# Supplementary material for: Antibacterial Effect of Sesame Protein-Derived Peptides against Escherichia coli and Staphylococcus aureus: In Silico and In Vitro Analysis
Source: MDPI journal article supplement (doi:10.3390/nu16010175), 2024-01-04
Supplement: s1 [file s1]

## Supplementary materials

**Table S1.** UniProtKB id, number of amino acids and molecular mass of sesame protein.

| Proteins                            | UniProtKB id and entry name | Amino acid residues | Molecular mass (Da) |
|-------------------------------------|-----------------------------|---------------------|---------------------|
| 11S globulin seed storage protein 2 | Q9XHP0 (11S2_SESIN)         | 459                 | 51840               |
| 2S seed storage protein 1           | Q9XHP1(2SS1_SESIN)          | 148                 | 17460               |

**Table S2.** The total number of ABPs peptides released from sesame protein hydrolysates by different proteases.

| Sesame protein                      | Pepsin + trypsin + chymotrypsin A | Total peptides/composed of 2-15 AA/ABPs |
|-------------------------------------|-----------------------------------|-----------------------------------------|
| 11S globulin seed storage protein 2 | PTC                               | 169/106/25                              |
| 2S seed storage protein 1           | PTC                               | 60/36/11                                |

**Table S3.** Physicochemical properties of ABPs using in silico predictions.

| S.no. | 11S globulin seed storage protein 2/peptides | Net charge | Hydrophobic ratio | pI    | MW (Da) | Water solubility      |
|-------|----------------------------------------------|------------|-------------------|-------|---------|-----------------------|
| 1     | VAF                                          | 0          | 0.47              | 5.88  | 335.43  | Poor water solubility |
| 2     | AL                                           | 0          | 0.39              | 5.88  | 202.27  | Poor water solubility |
| 3     | QCAGIVAM                                     | 0          | 0.19              | 5.85  | 792.09  | Poor water solubility |
| 4     | STIR                                         | 1          | -0.37             | 10.11 | 475.59  | Good water solubility |
| 5     | GL                                           | 0          | 0.35              | 5.88  | 188.25  | Poor water solubility |
| 6     | PSPR                                         | 1          | -0.54             | 10.11 | 455.55  | Good water solubility |
| 7     | GQGL                                         | 0          | 0.04              | 5.88  | 373.47  | Poor water solubility |
| 8     | ISIM                                         | 0          | 0.36              | 5.88  | 462.66  | Poor water solubility |
| 9     | SQR                                          | 1          | -0.9              | 10.11 | 389.44  | Good water solubility |
| 10    | TM                                           | 0          | 0.04              | 5.88  | 250.33  | Poor water solubility |
| 11    | GSVR                                         | 1          | -0.33             | 10.11 | 417.51  | Good water solubility |
| 12    | DL                                           | -1         | -0.09             | 3.8   | 246.28  | Good water solubility |
| 13    | AF                                           | 0          | 0.43              | 5.88  | 236.28  | Poor water solubility |
| 14    | AGGVPR                                       | 1          | -0.12             | 10.11 | 555.71  | Good water solubility |
| 15    | IF                                           | 0          | 0.67              | 5.88  | 278.37  | Poor water solubility |

| 16    | IVM                                | 0          | 0.51              | 5.88  | 361.54  | Poor water solubility |
|-------|------------------------------------|------------|-------------------|-------|---------|-----------------------|
| 17    | PIL                                | 0          | 0.4               | 5.88  | 341.49  | Poor water solubility |
| 18    | SM                                 | 0          | 0                 | 5.88  | 236.3   | Good water solubility |
| 19    | VTR                                | 1          | -0.47             | 10.11 | 374.47  | Good water solubility |
| 20    | GQAL                               | 0          | 0.06              | 5.88  | 387.49  | Poor water solubility |
| 21    | GF                                 | 0          | 0.39              | 5.88  | 222.26  | Poor water solubility |
| 22    | EW                                 | -1         | -0.12             | 4     | 333.36  | Good water solubility |
| 23    | AM                                 | 0          | 0.26              | 5.88  | 220.3   | Poor water solubility |
| 24    | PL                                 | 0          | 0.23              | 5.88  | 228.31  | Poor water solubility |
| 25    | GSQSF                              | 0          | -0.09             | 5.88  | 524.59  | Poor water solubility |
| S.no. | 2S seed storage protein 1/peptides | Net charge | Hydrophobic ratio | pI    | MW (Da) | Water solubility      |
| 1     | AAAL                               | 0          | 0.32              | 5.88  | 344.45  | Poor water solubility |
| 2     | CM                                 | 0          | 0.15              | 5.85  | 252.36  | Poor water solubility |
| 3     | QW                                 | 0          | -0.16             | 5.88  | 332.38  | Poor water solubility |
| 4     | SM                                 | 0          | 0                 | 5.88  | 236.3   | Good water solubility |
| 5     | EH                                 | -1         | -0.51             | 5.25  | 284.29  | Good water solubility |
| 6     | EL                                 | -1         | -0.04             | 4     | 260.31  | Good water solubility |
| 7     | QM                                 | 0          | -0.21             | 5.88  | 277.36  | Poor water solubility |
| 8     | GM                                 | 0          | 0.21              | 5.88  | 206.28  | Poor water solubility |
| 9     | QQM                                | 0          | -0.37             | 5.88  | 405.51  | Poor water solubility |
| 10    | CGM                                | 0          | 0.15              | 5.85  | 309.43  | Poor water solubility |
| 11    | PIF                                | 0          | 0.42              | 5.88  | 375.5   | Poor water solubility |

**Table S4.** Predicted toxicity, sensitization and Tanimoto similarity index using ABPs proteins from UniProtKB and NCBI databases.

| 11s globulin/ABPs | ToxicityPrediction | allergenicity         | Tanimoto Similarity               |
|-------------------|--------------------|-----------------------|-----------------------------------|
| VAF               | Non-Toxin          | PROBABLE NON-ALLERGEN | UniProtKB accession number P80820 |

| AL               | Non-Toxin           | PROBABLE NON-ALLERGEN    | UniProtKB accession number Q8IZT6 |
|------------------|---------------------|--------------------------|-----------------------------------|
| QCAGIVAM         | Non-Toxin           | PROBABLE NON-ALLERGEN    | UniProtKB accession number P80813 |
| STIR             | Non-Toxin           | PROBABLE NON-ALLERGEN    | UniProtKB accession number Q8IZT6 |
| GL               | Non-Toxin           | PROBABLE ALLERGEN        | NCBI gi number 51316200           |
| PSPR             | Non-Toxin           | PROBABLE NON-ALLERGEN    | UniProtKB accession number P80820 |
| GQGL             | Non-Toxin           | PROBABLE NON-ALLERGEN    | UniProtKB accession number P80820 |
| ISIM             | Non-Toxin           | PROBABLE ALLERGEN        | NCBI gi number 51316200           |
| SQR              | Non-Toxin           | PROBABLE NON-ALLERGEN    | UniProtKB accession number P80820 |
| TM               | Non-Toxin           | PROBABLE NON-ALLERGEN    | UniProtKB accession number Q8IZT6 |
| GSVR             | Non-Toxin           | PROBABLE NON-ALLERGEN    | UniProtKB accession number P80820 |
| DL               | Non-Toxin           | PROBABLE NON-ALLERGEN    | UniProtKB accession number Q8IZT6 |
| AF               | Non-Toxin           | PROBABLE ALLERGEN        | NCBI gi number 51316200           |
| AGGVPR           | Non-Toxin           | PROBABLE NON-ALLERGEN    | UniProtKB accession number Q8IZT6 |
| IF               | Non-Toxin           | PROBABLE NON-ALLERGEN    | UniProtKB accession number Q8IZT6 |
| IVM              | Non-Toxin           | PROBABLE ALLERGEN        | NCBI gi number 51316200           |
| PIL              | Non-Toxin           | PROBABLE ALLERGEN        | NCBI gi number 51316200           |
| SM               | Non-Toxin           | PROBABLE NON-ALLERGEN    | UniProtKB accession number Q8IZT6 |
| VTR              | Non-Toxin           | PROBABLE NON-ALLERGEN    | UniProtKB accession number P80820 |
| GQAL             | Non-Toxin           | PROBABLE ALLERGEN        | NCBI gi number 51316200           |
| GF               | Non-Toxin           | PROBABLE NON-ALLERGEN    | UniProtKB accession number Q8IZT6 |
| EW               | Non-Toxin           | PROBABLE NON-ALLERGEN    | UniProtKB accession number Q8IZT6 |
| AM               | Non-Toxin           | PROBABLE NON-ALLERGEN    | UniProtKB accession number Q8IZT6 |
| PL               | Non-Toxin           | PROBABLE NON-ALLERGEN    | UniProtKB accession number Q8IZT6 |
| GSQSF            | Non-Toxin           | PROBABLE ALLERGEN        | NCBI gi number 51316200           |
| 2s globulin/ABPs | Toxicity Prediction | Allergenicity prediction | Tanimoto Similarity               |
| AAAL             | Non-Toxin           | NON-ALLERGEN             | UniProtKB P80820                  |
| CM               | Non-Toxin           | NON-ALLERGEN             | UniProtKB Q8IZT6                  |

|      |                     |                             |                            |
|------|---------------------|-----------------------------|----------------------------|
| QW   | Non-Toxin           | NON-ALLERGEN                | UniProtKB Q8IZT6           |
| SM   | Non-Toxin           | NON-ALLERGEN                | UniProtKB Q8IZT6           |
| EH   | Non-Toxin           | NON-ALLERGEN                | UniProtKB Q8IZT6           |
| EL   | Non-Toxin           | NON-ALLERGEN                | UniProtKB Q8IZT6           |
| QM   | Non-Toxin           | NON-ALLERGEN                | UniProtKB Q8IZT6           |
| GM   | Non-Toxin           | NON-ALLERGEN                | UniProtKB Q8IZT6           |
| QQM  | Non-Toxin           | PROBABLE<br>ALLERGEN        | NCBI gi number<br>51316200 |
| CGM  | Non-Toxin           | NON-ALLERGEN                | UniProtKB P80820           |
| PIF  | Non-Toxin           | NON-ALLERGEN                | UniProtKB P80821           |
| ABPs | Toxicity Prediction | Allergenicity<br>prediction | Tanimoto Similarity        |

---
